# Supplementary material for: Novel 2-(Adamantan-1-ylamino)Thiazol-4(5H)-One Derivatives and Their Inhibitory Activity towards 11β-HSD1—Synthesis, Molecular Docking and In Vitro Studies
Source: MDPI journal article supplement (doi:10.3390/ijms22168609), 2021-08-10
Supplement: s1 [file s1]

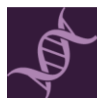

# Novel 2-(Adamantan-1-ylamino)Thiazol-4(5H)-One Derivatives and Their Inhibitory Activity towards 11 $\beta$ -HSD1 – synthesis, Molecular Docking and In Vitro Studies

Renata Studzińska <sup>1,\*</sup>, Daria Kupczyk <sup>2</sup>, Wojciech Płaziński <sup>3</sup>, Szymon Baumgart <sup>1</sup>, Rafał Bilski <sup>2</sup>, Renata Paprocka <sup>1</sup> and Renata Kołodziejska <sup>2</sup>

<sup>1</sup> Department of Organic Chemistry, Faculty of Pharmacy, Collegium Medicum in Bydgoszcz, Nicolaus Copernicus University in Toruń, 2 Jurasza Str., 85–089 Bydgoszcz, Poland; sz.baumgart@cm.umk.pl (Sz.B.); renata.bursa@cm.umk.pl (R.P.)

<sup>2</sup> Department of Medical Biology and Biochemistry, Faculty of Medicine, Collegium Medicum in Bydgoszcz, Nicolaus Copernicus University in Toruń, 24 Karłowicza Str., 85–092 Bydgoszcz, Poland; dariak@cm.umk.pl (D.K.); rafal.bilski@cm.umk.pl (R.B.); renatak@cm.umk.pl (R.K.)

<sup>3</sup> J. Haber Institute of Catalysis and Surface Chemistry, Polish Academy of Sciences, 8 Niezapominajek Str., 30-239 Cracow, Poland; wojtek\_plazinski@tlen.pl

\* Correspondence: rstud@cm.umk.pl

## Supplementary information

<sup>1</sup>H NMR spectra of compounds 3a–j.

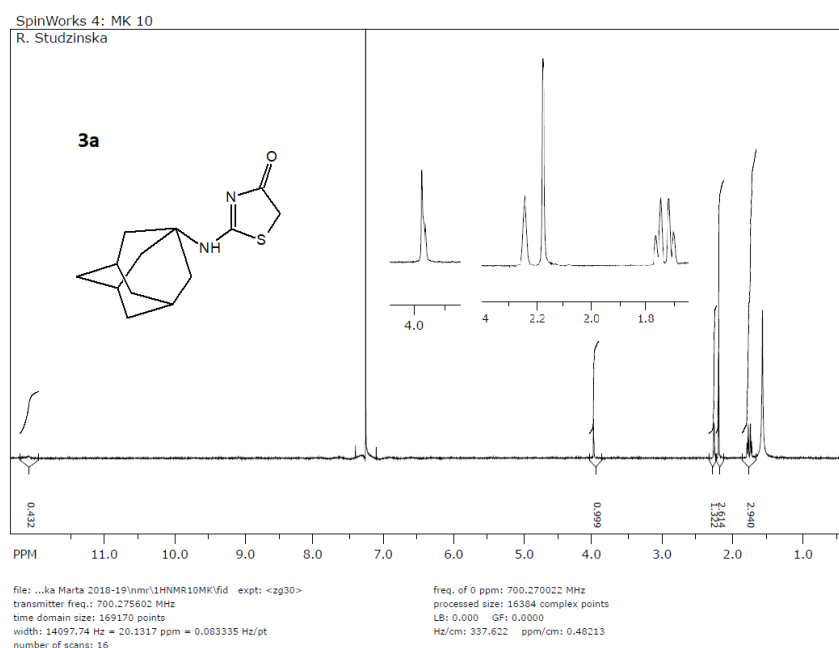

Figure S1A <sup>1</sup>H NMR spectra of compound 3a.

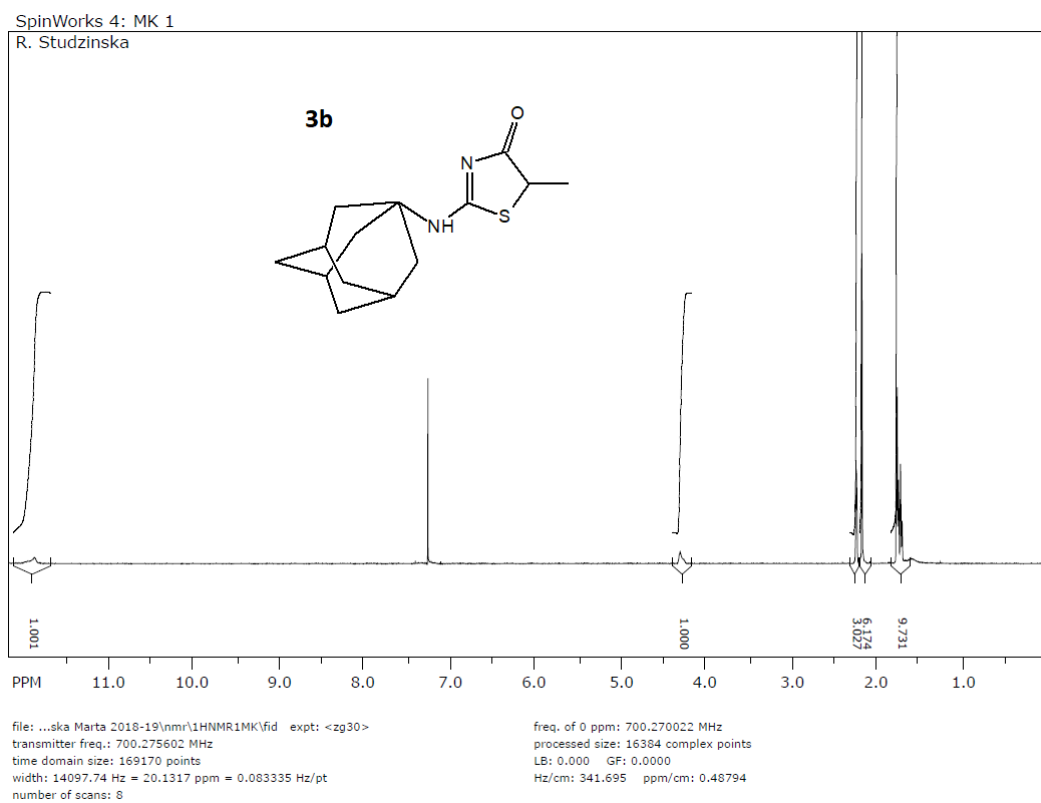Figure S1B  $^1\text{H}$  NMR spectra of compound **3b**.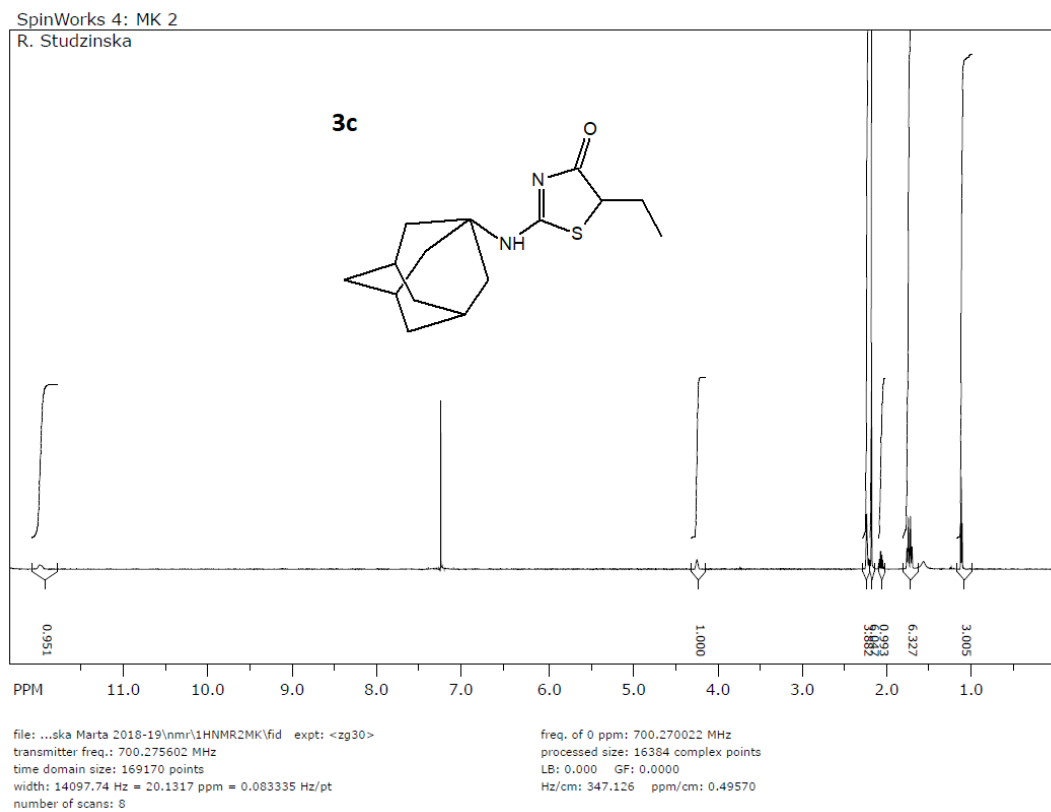Figure S1C.  $^1\text{H}$  NMR spectra of compound **3c**.

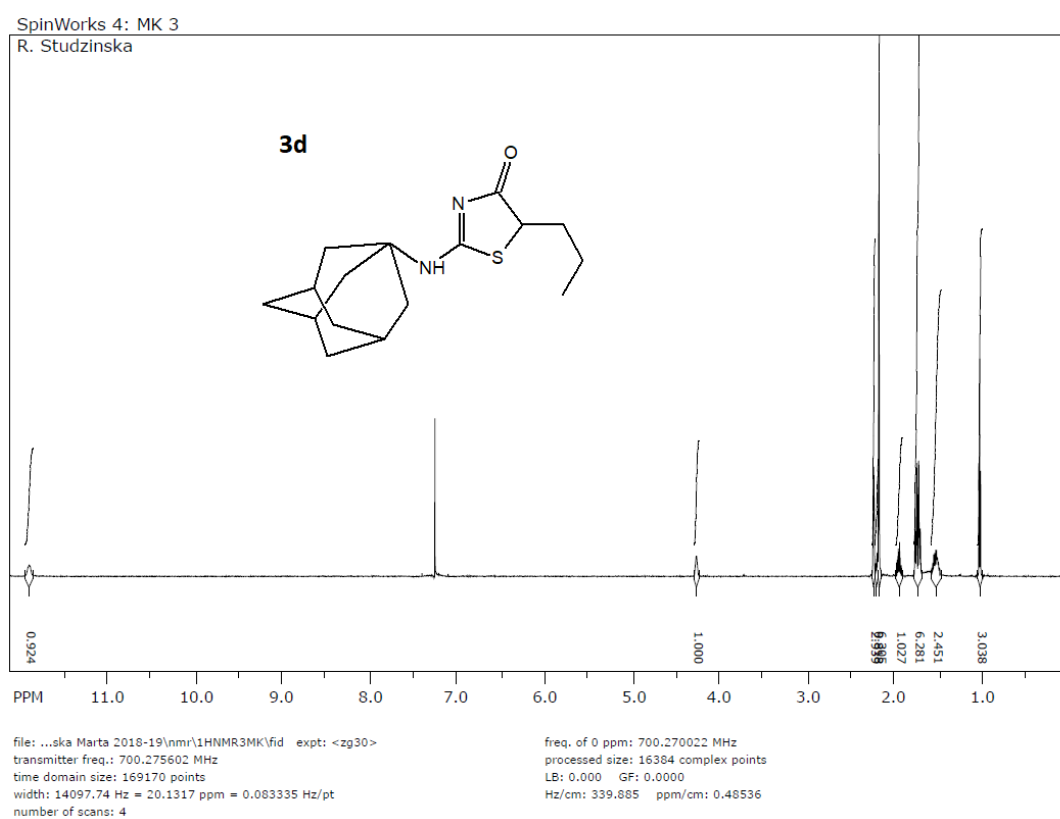Figure S1D. <sup>1</sup>H NMR spectra of compound 3d.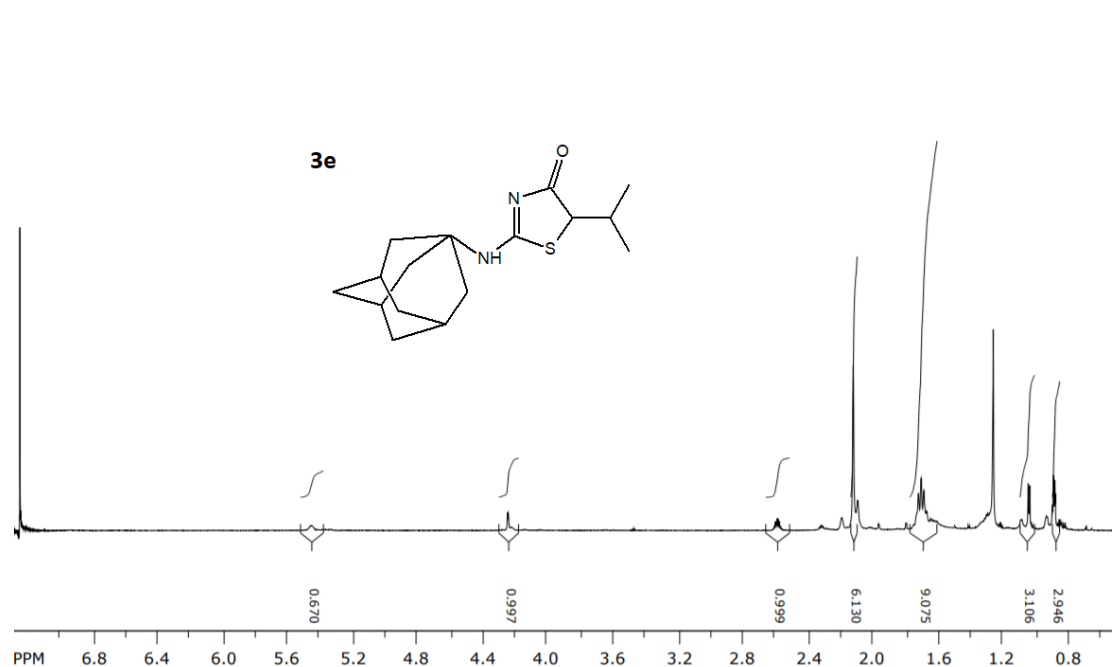Figure S1E. <sup>1</sup>H NMR spectra of compounds 3e.

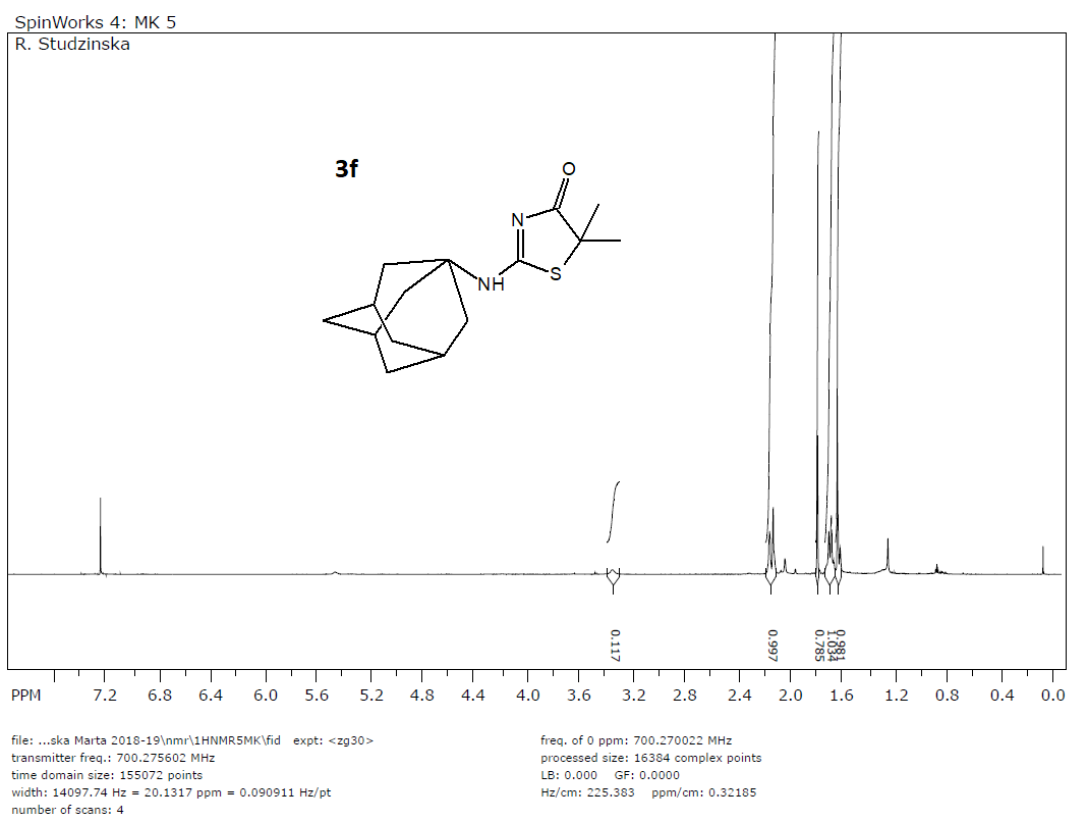Figure S1F. <sup>1</sup>H NMR spectra of compound **3f**.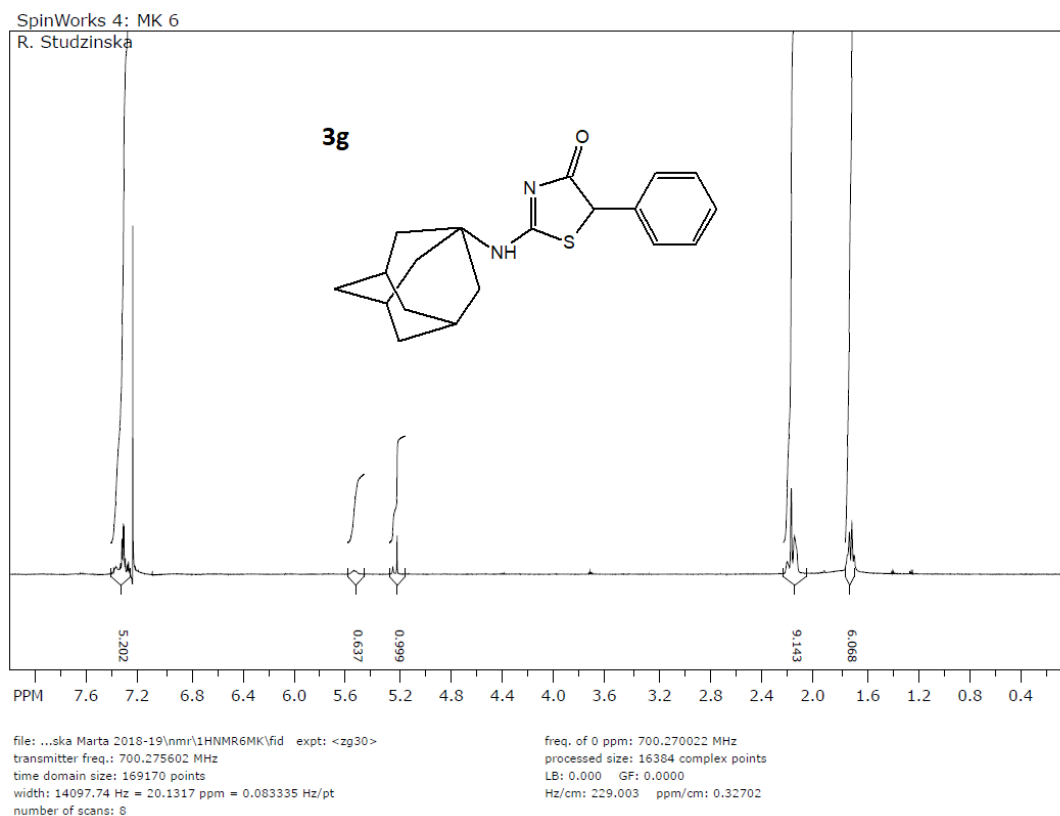Figure S1G. <sup>1</sup>H NMR spectra of compound **3g**.

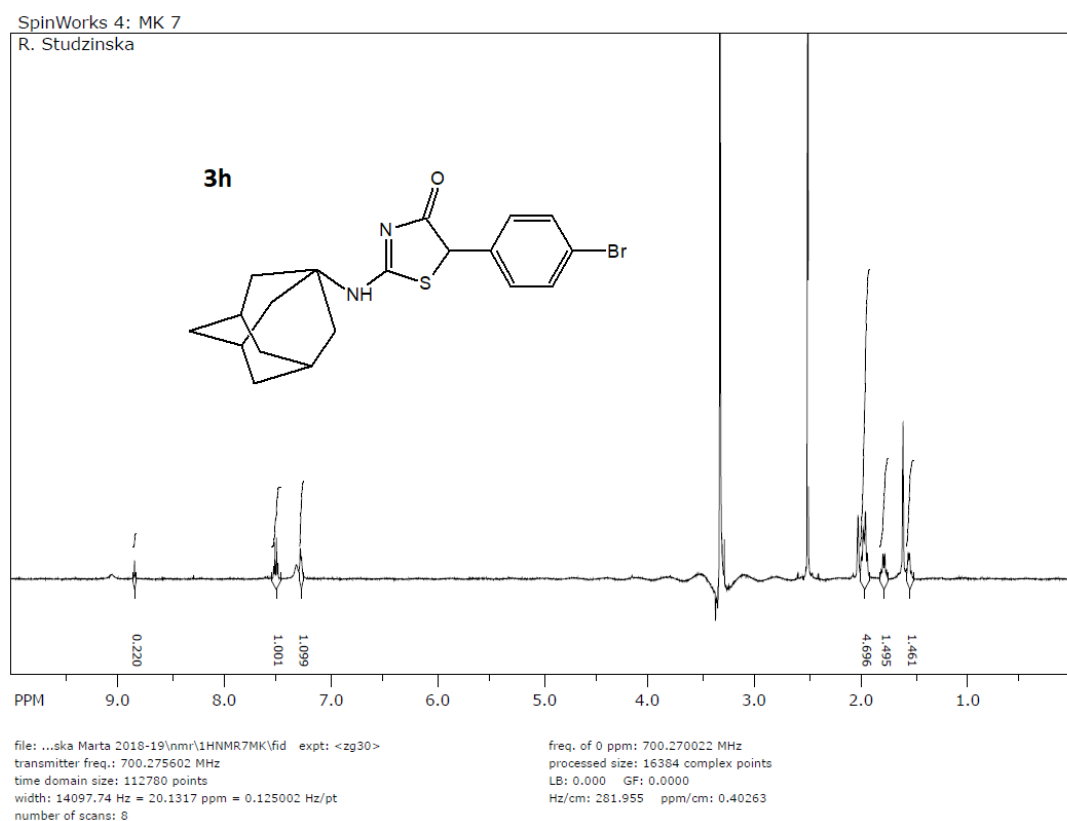Figure S1H. <sup>1</sup>H NMR spectra of compound **3h**.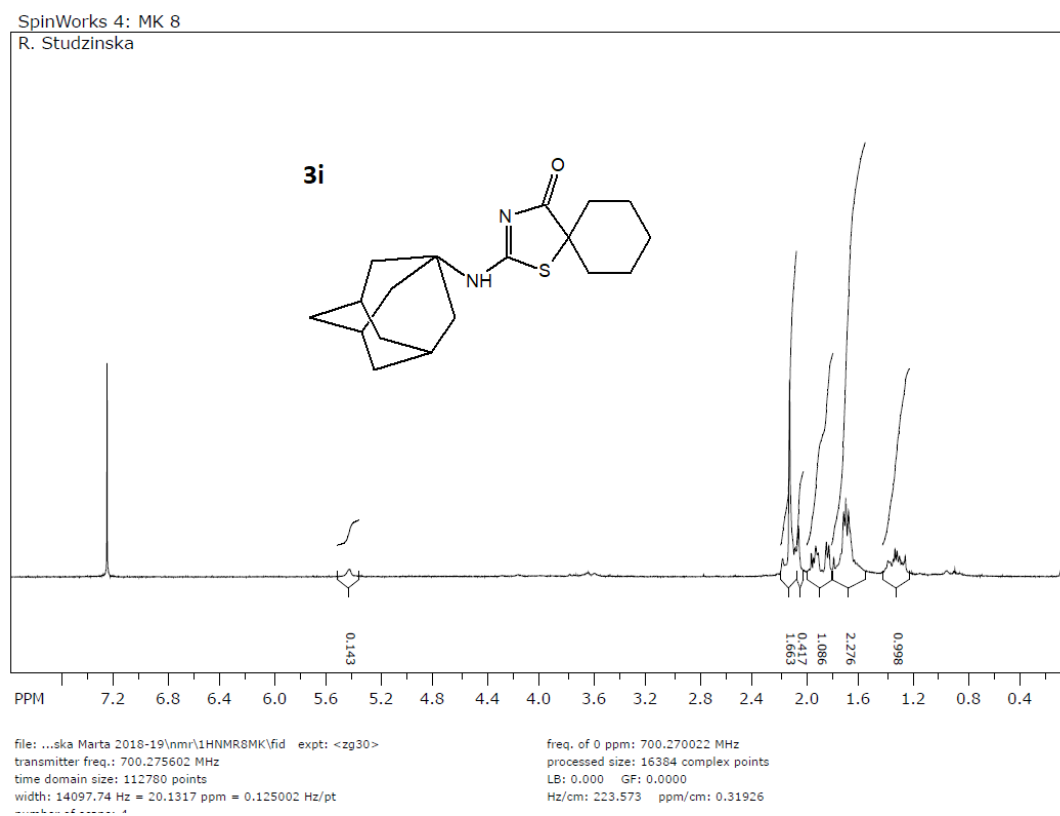Figure S1I. <sup>1</sup>H NMR spectra of compound **3i**.

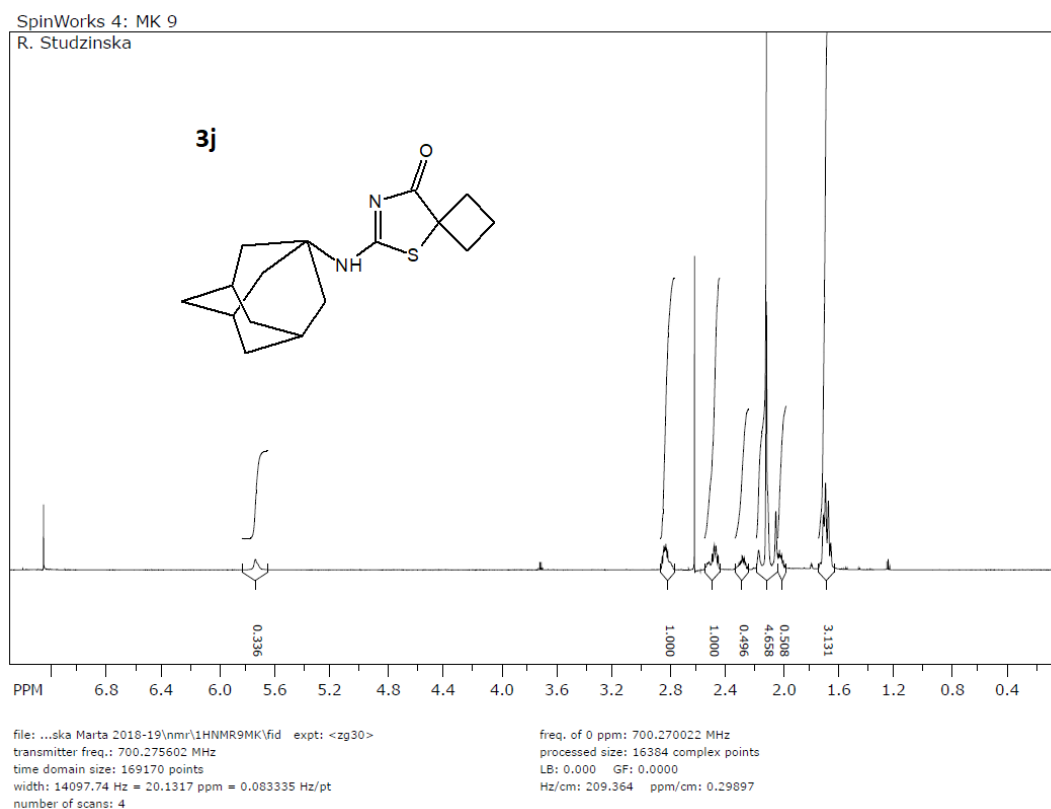Figure S1J. <sup>1</sup>H NMR spectra of compound **3j**.<sup>13</sup>C NMR spectra of compounds **3a–j**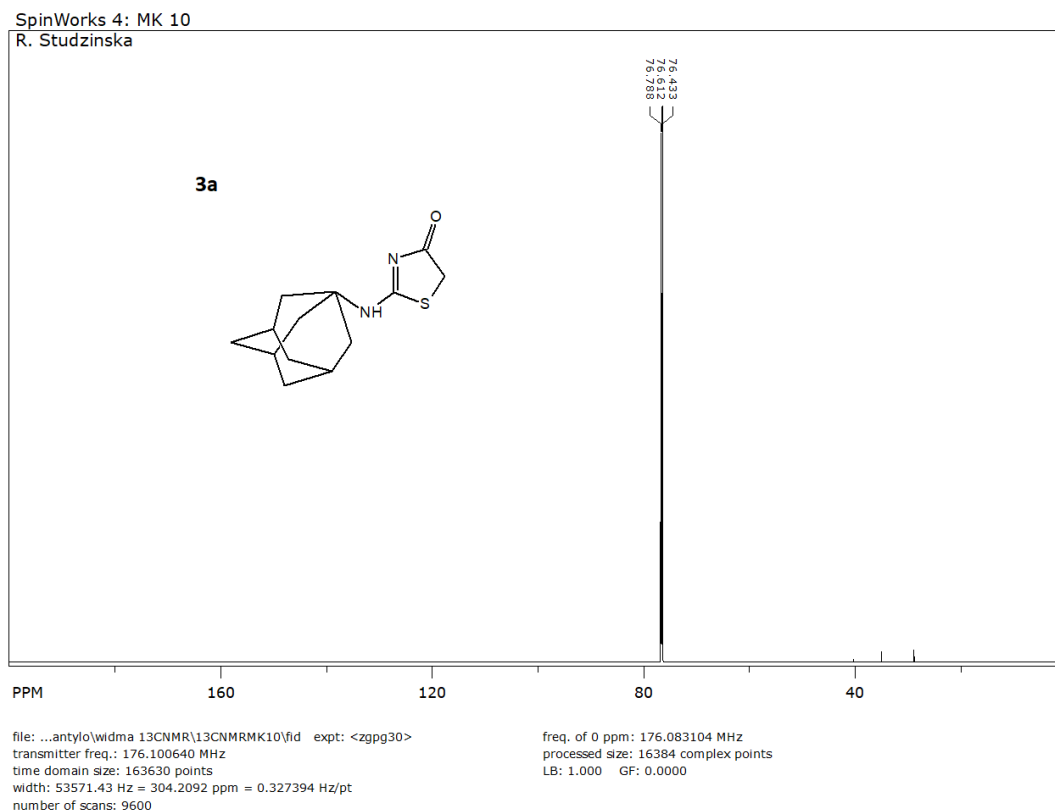

Figure S2A.  $^{13}\text{C}$  NMR spectra of compound 3a.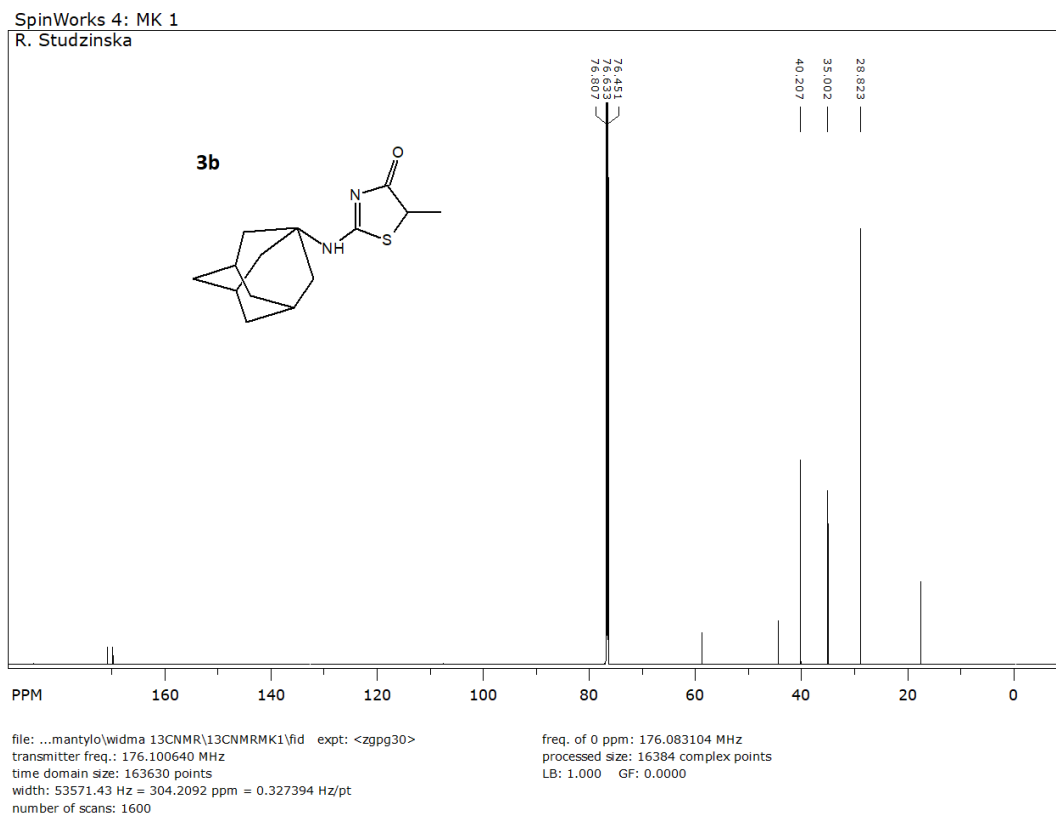Figure S2B.  $^{13}\text{C}$  NMR spectra of compound 3b.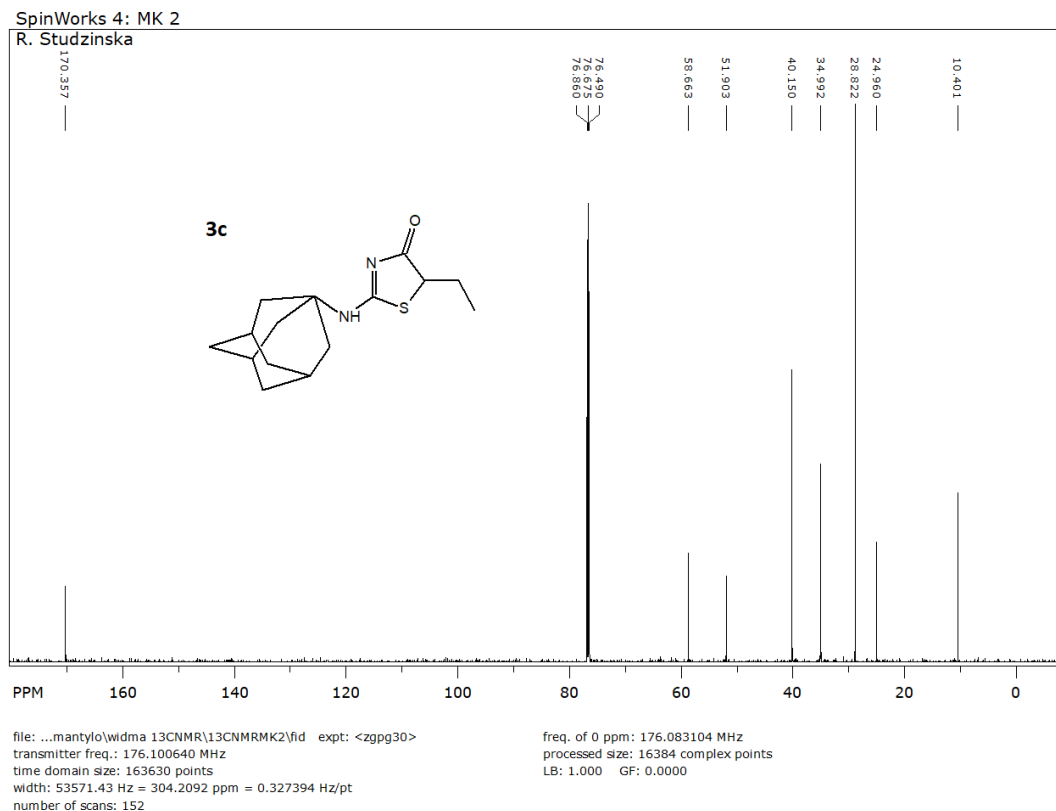Figure S2C.  $^{13}\text{C}$  NMR spectra of compound 3c.

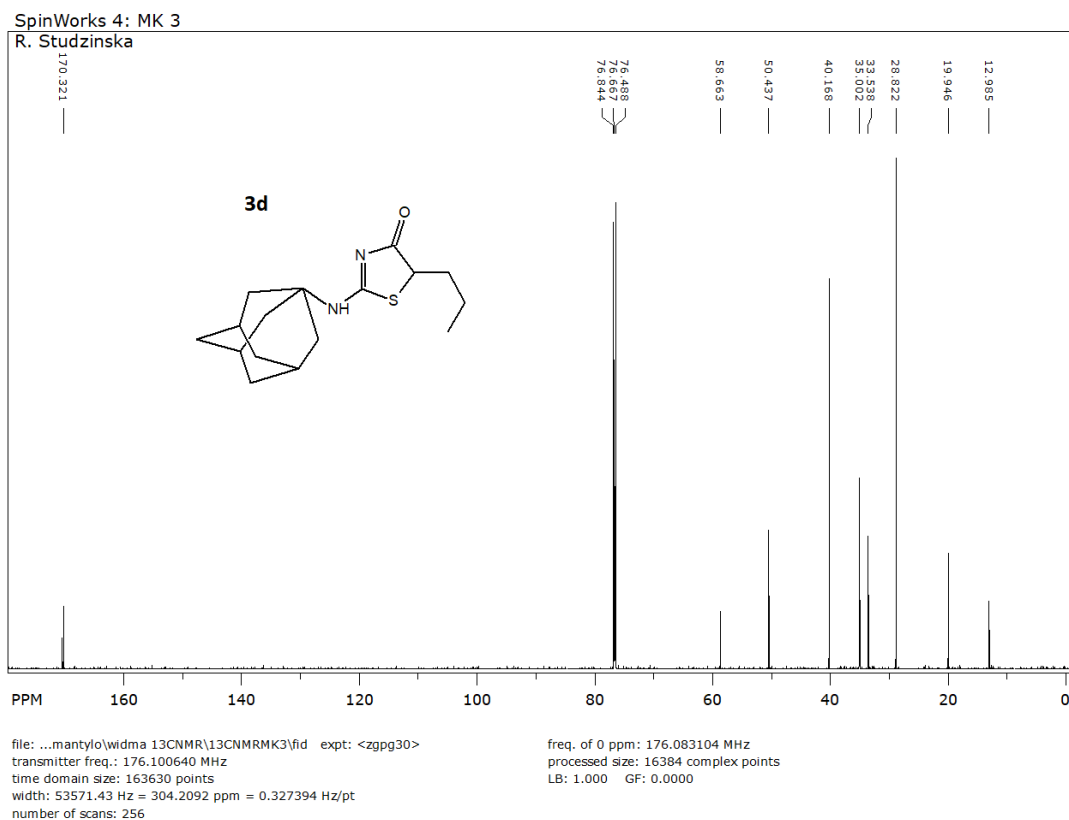Figure S2D. <sup>13</sup>C NMR spectra of compound **3d**.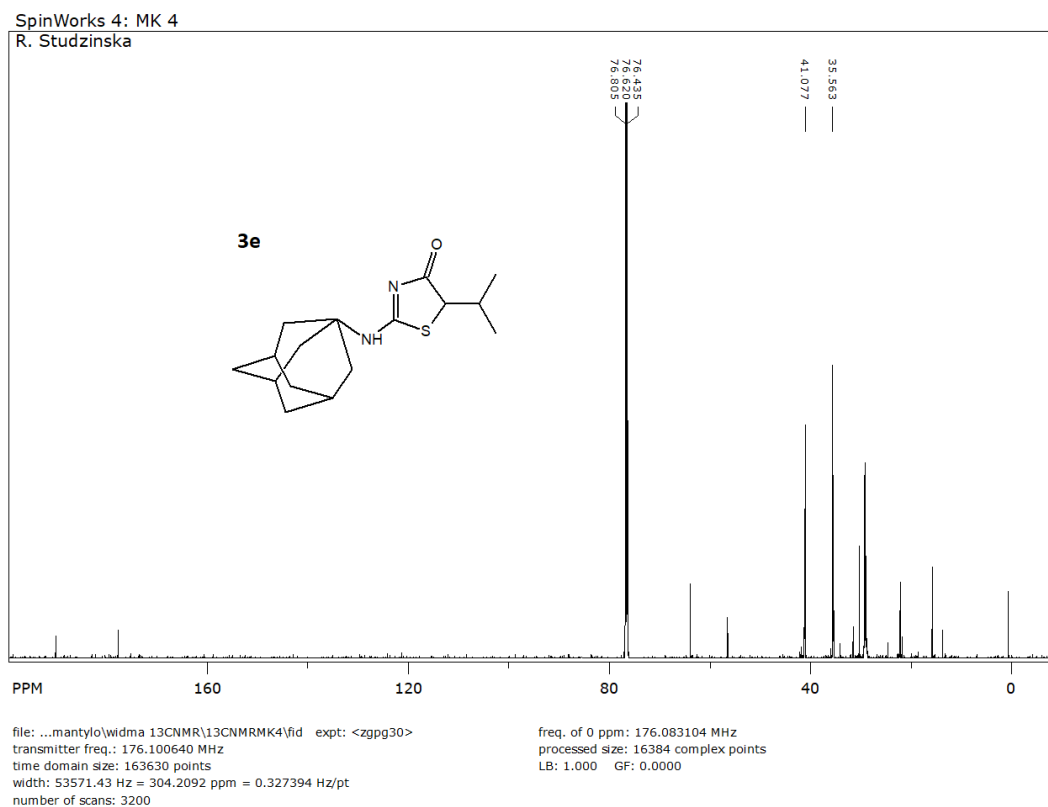Figure S2E. <sup>13</sup>C NMR spectra of compound **3e**.



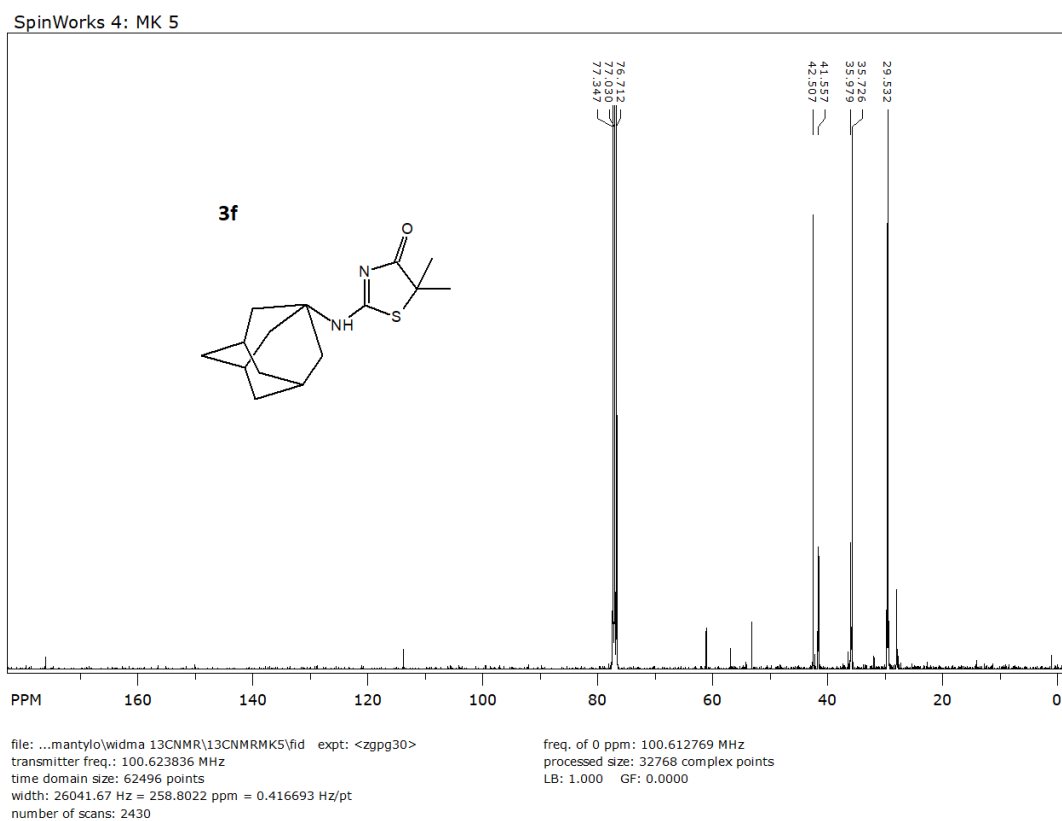Figure S2F. <sup>13</sup>C NMR spectra of compound **3f**.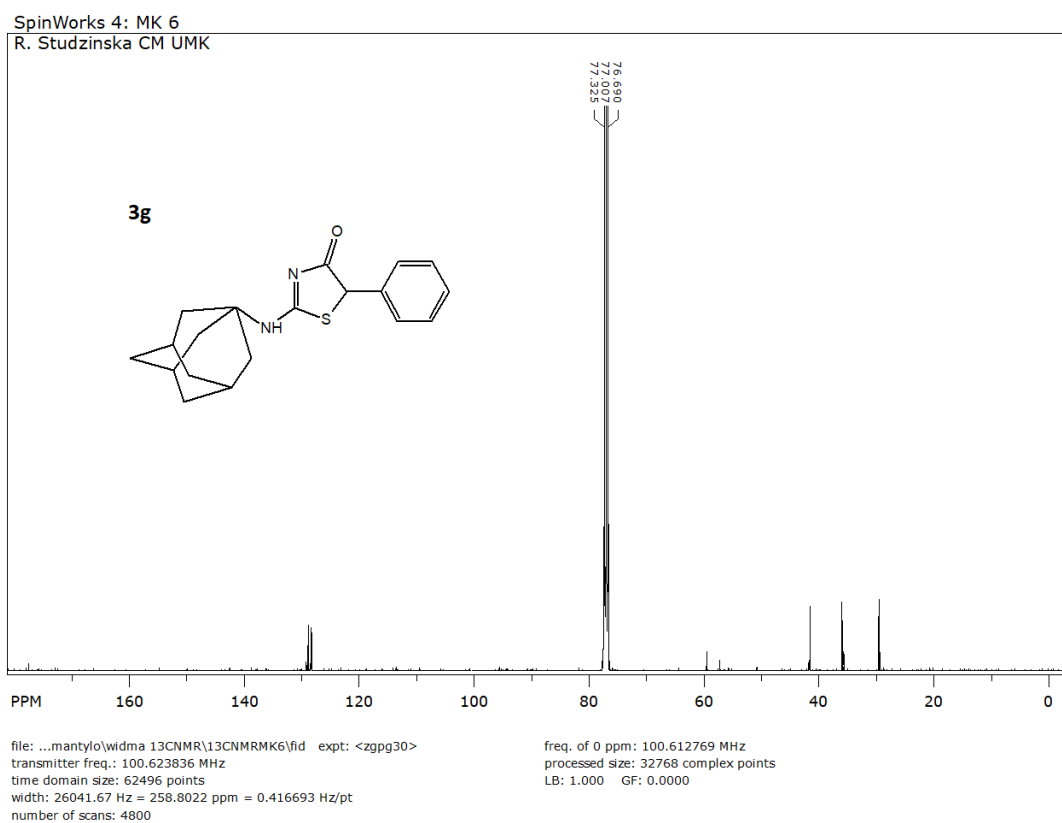Figure S2G. <sup>13</sup>C NMR spectra of compound **3g**.

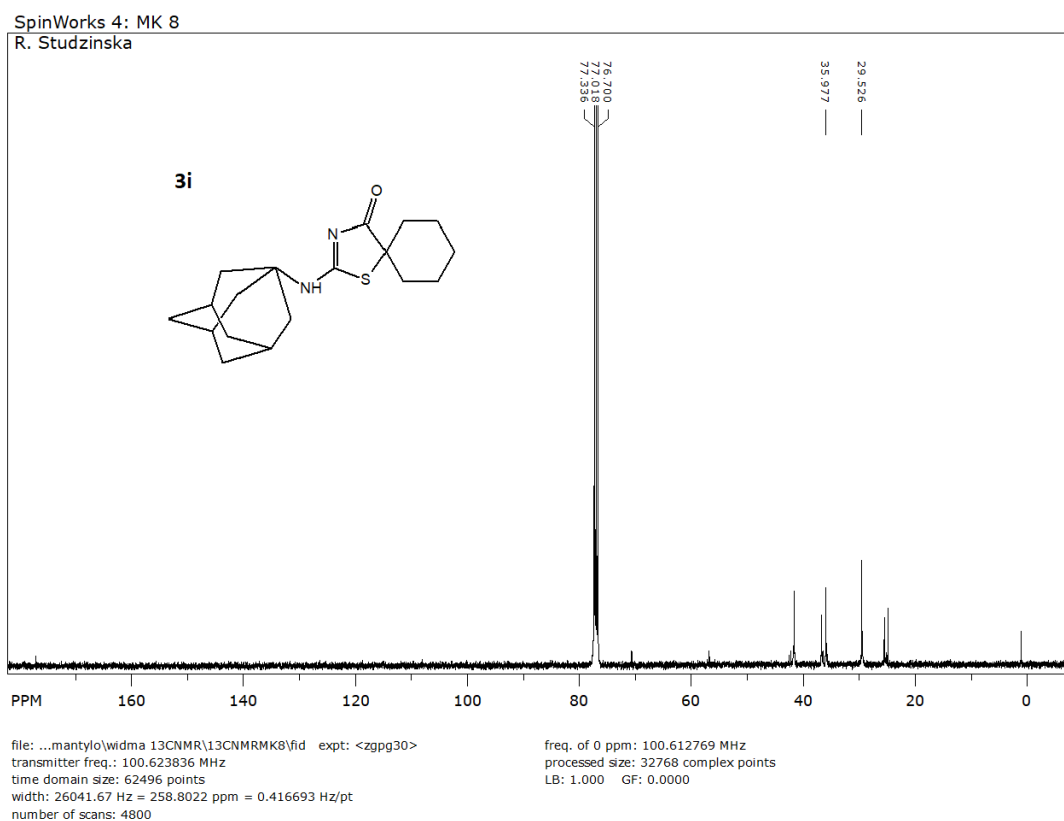Figure S2H. <sup>13</sup>C NMR spectra of compound **3i**.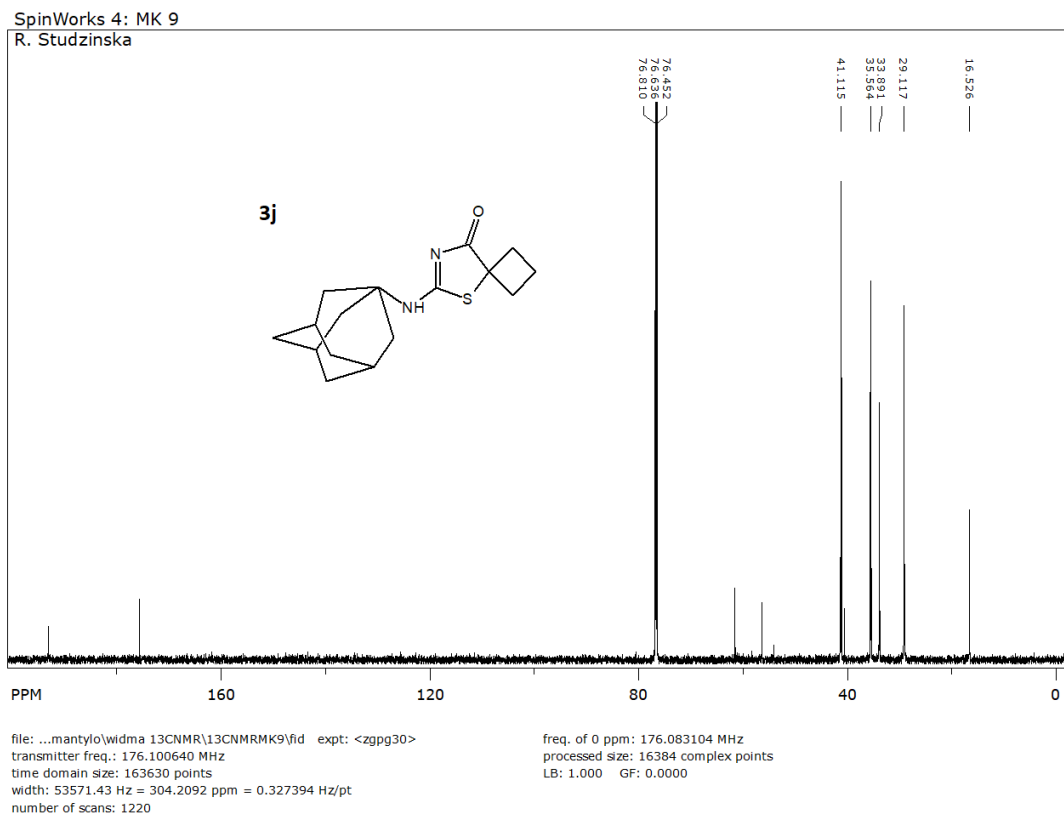Figure S2I. <sup>13</sup>C NMR spectra of compound **3j**.Mass spectrum of compounds **3a–j**

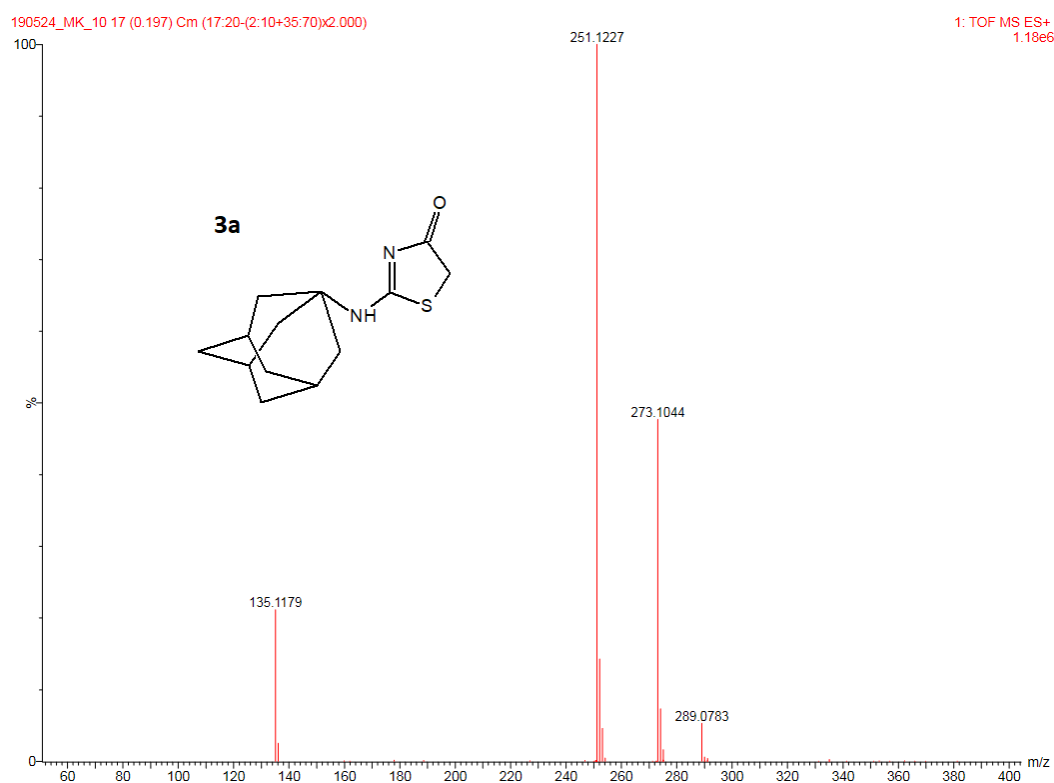Figure S3A. Mass spectrum of compound **3a**.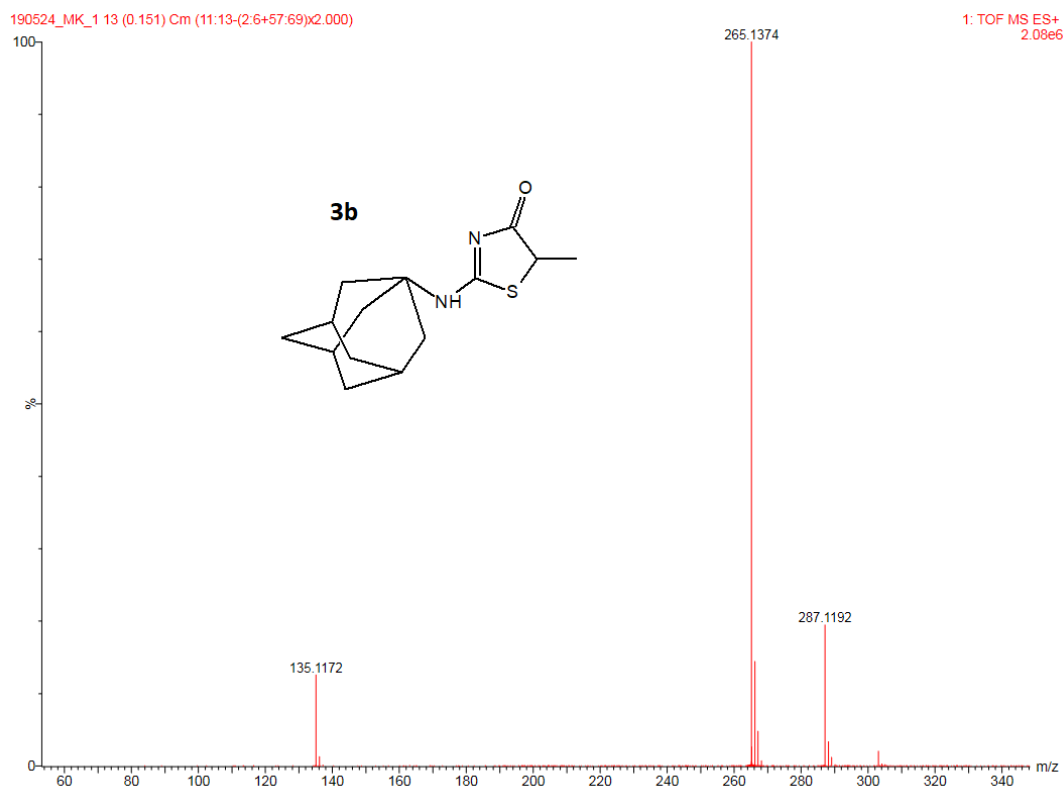Figure S3B. Mass spectrum of compound **3b**.

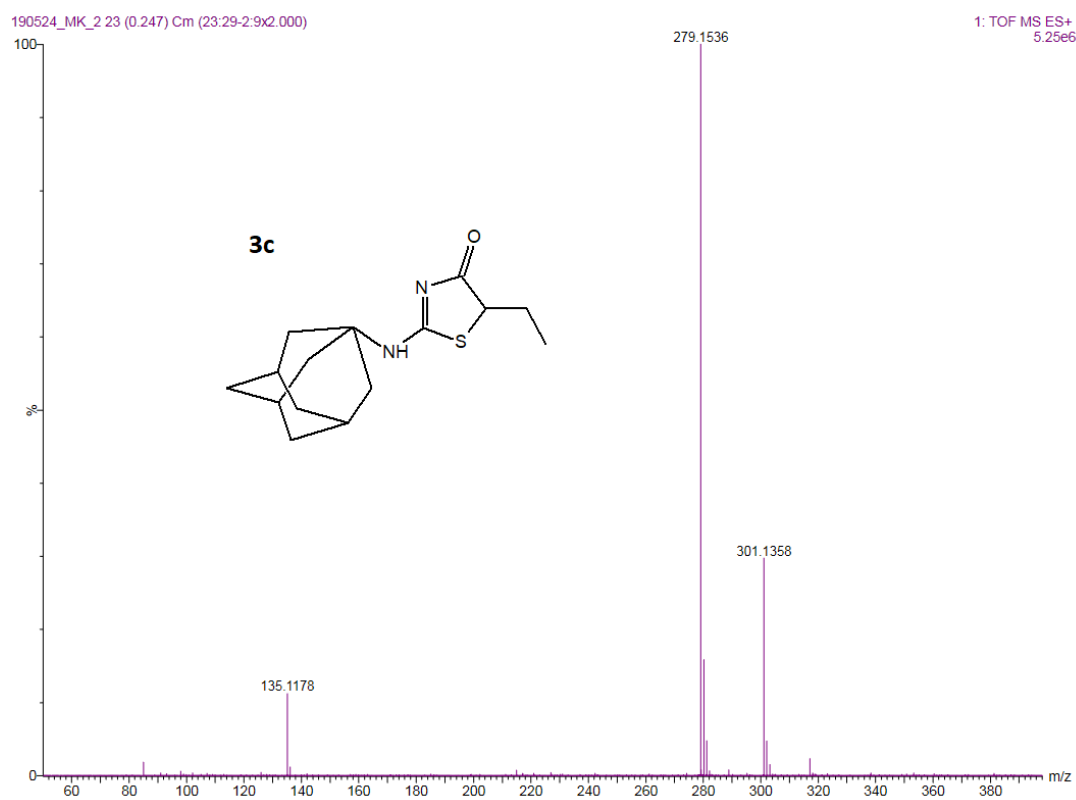Figure S3C. Mass spectrum of compound **3c**.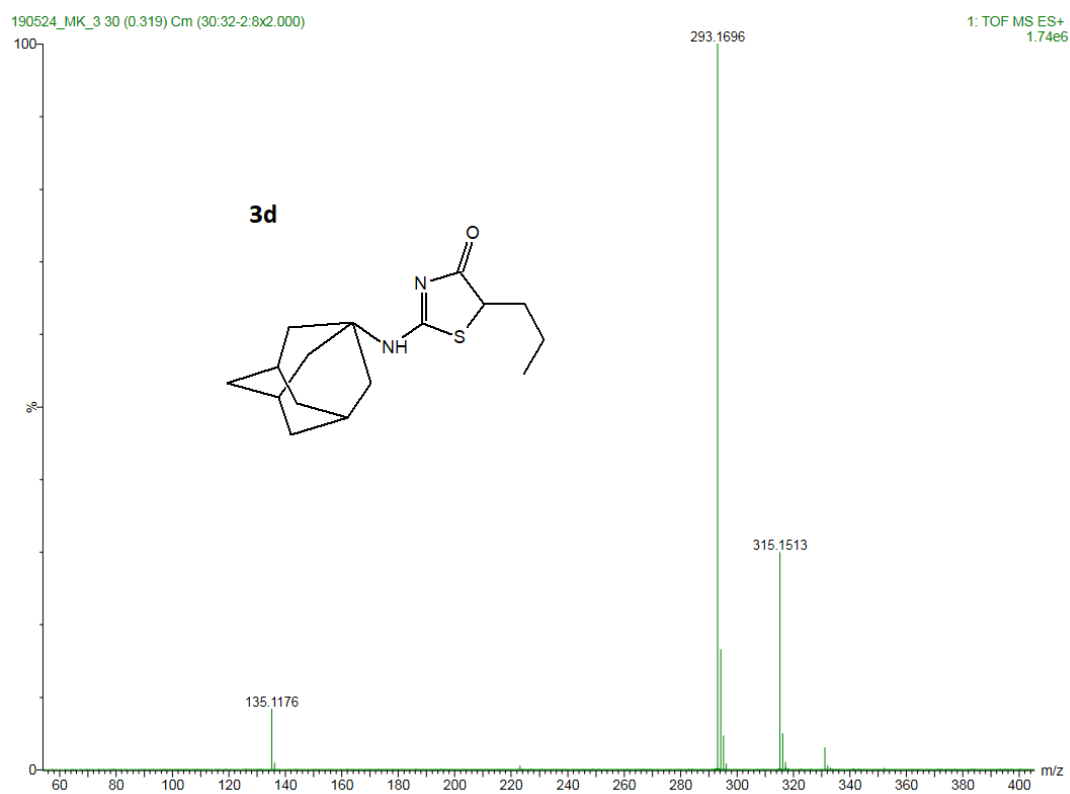Figure S3D. Mass spectrum of compound **3d**.

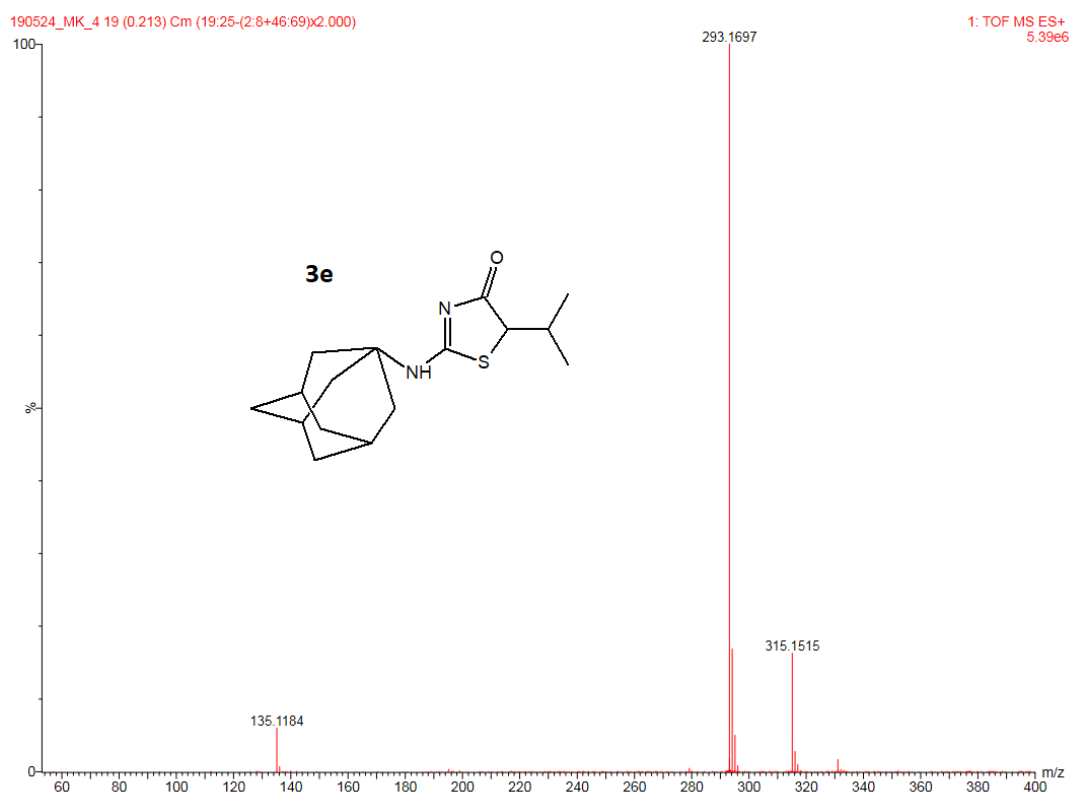Figure S3E. Mass spectrum of compound **3e**.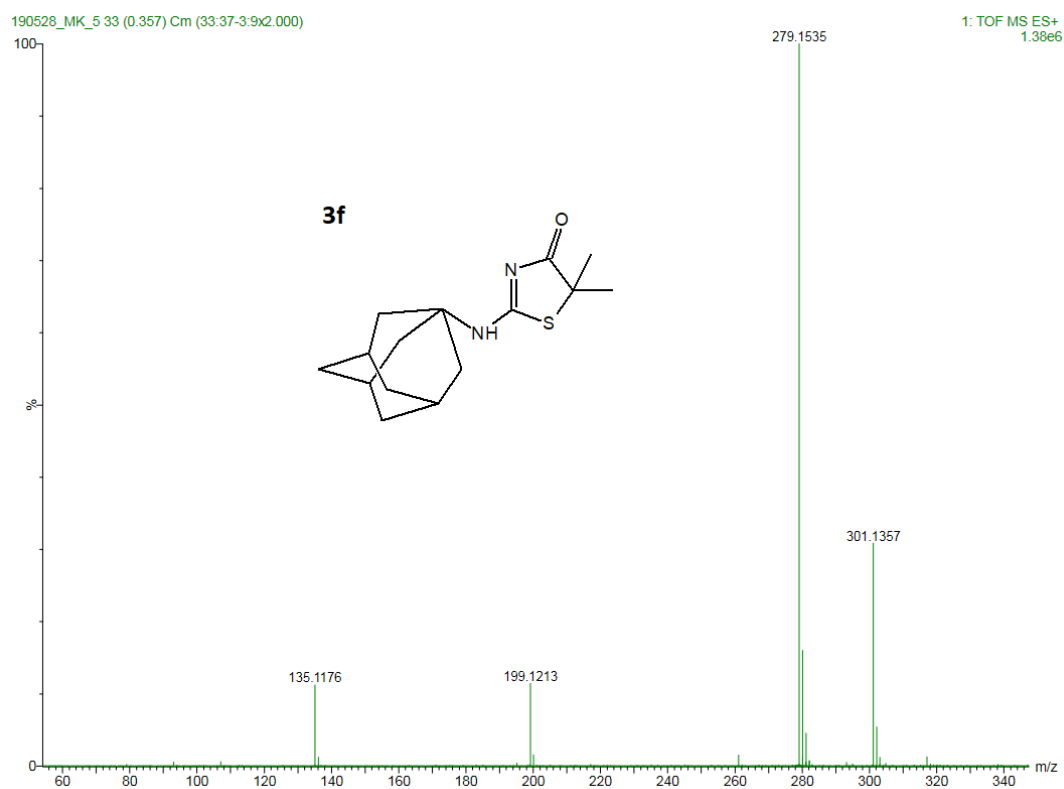Figure S3F Mass spectrum of compound **3f**.

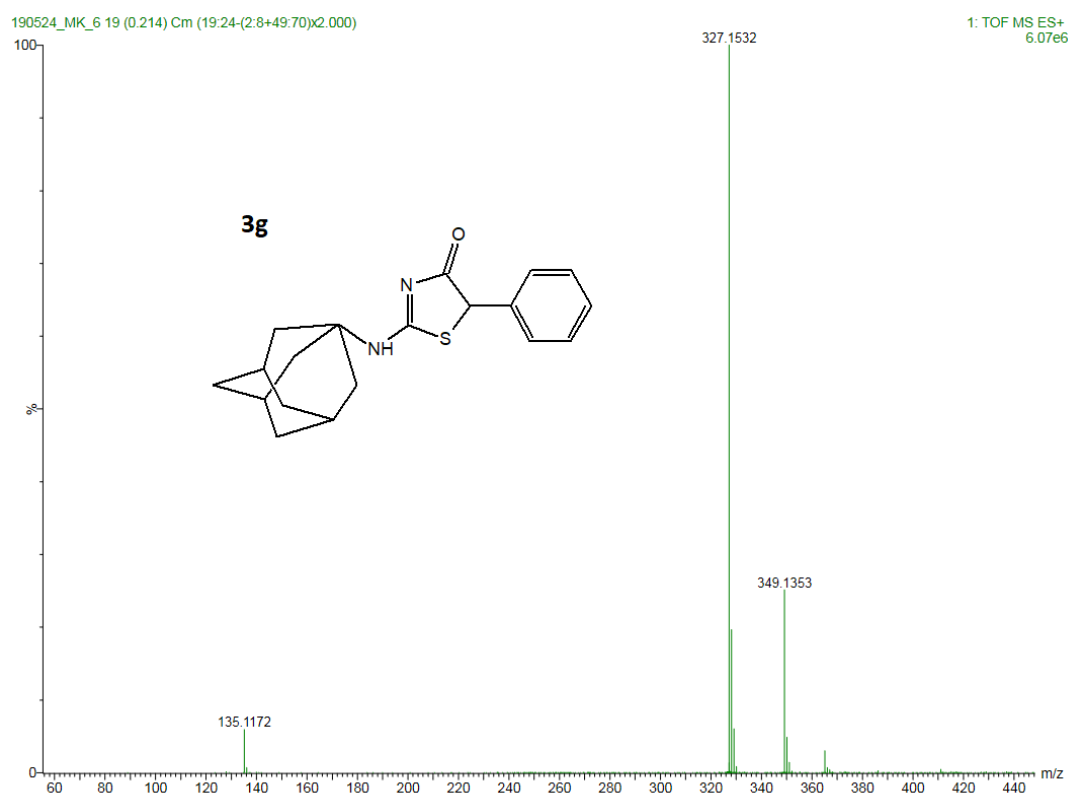Figure S3G. Mass spectrum of compound **3g**.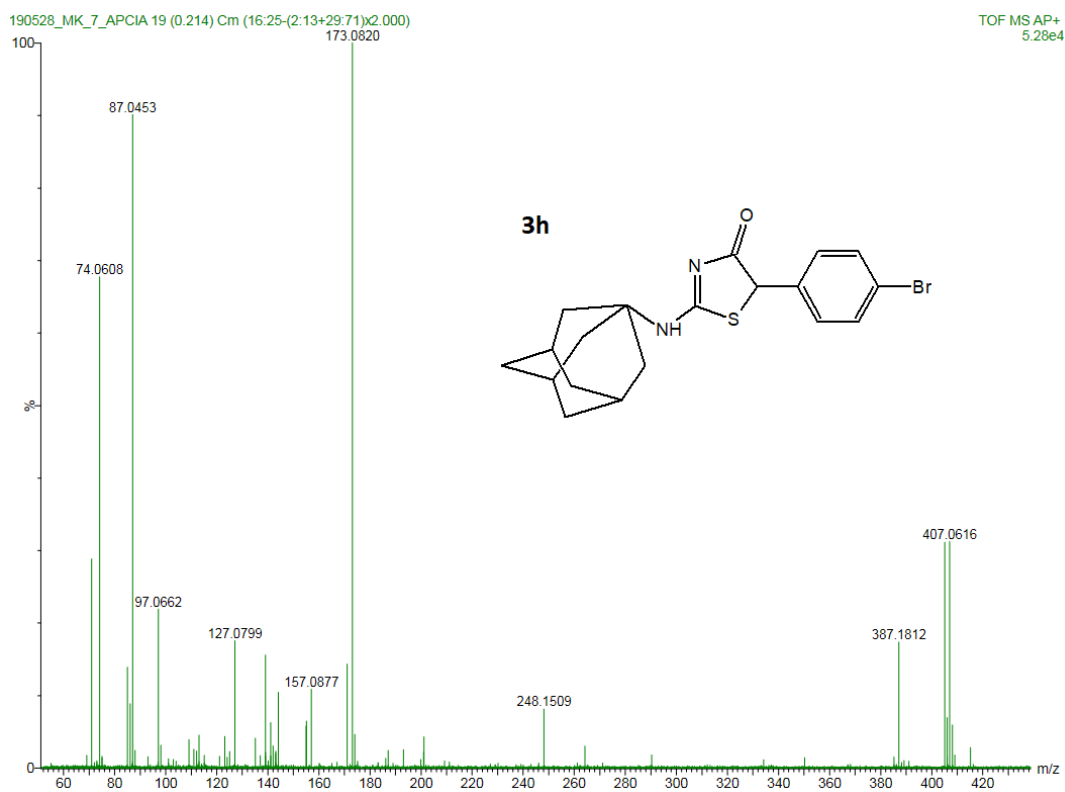Figure S3H Mass spectrum of compound **3h**.

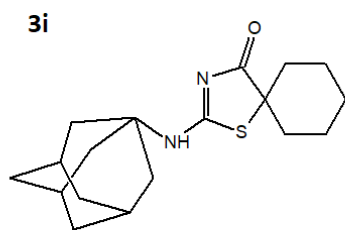

**Figure S3I.** Mass spectrum of compound **3i**.

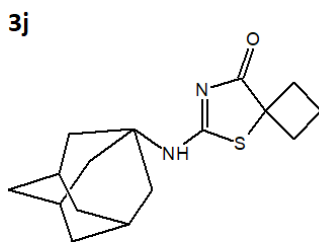

**Figure S3J.** Mass spectrum of compound **3j**.
